# Supplementary material
Source: PubMed Central journal article supplement (PMC4659731)
Supplement: NIHMS731429-supplement-Legacy_Supplemental_File.pdf [file NIHMS731429-supplement-Legacy_Supplemental_File.pdf]

---

**From:** Dexter, Phyllis Adele [pdexter2@iu.edu]  
**Sent:** Friday, September 25, 2015 11:03 AM  
**To:** Bakas, Tamilyn (bakastn)  
**Subject:** RE: Need written approval for manuscript

Tami,

I give my permission to be mentioned by name in the Acknowledgement section of the manuscript entitled, "*Telephone Assessment and Skill-Building Kit for Stroke Caregivers: A Randomized Controlled Clinical Trial*" (MS ID: STROKE/2015/011099 – R1) that was submitted to the journal *Stroke* by first author Tamilyn Bakas.

Phyllis Dexter

**From:** Bakas, Tamilyn (bakastn) [mailto:bakastn@ucmail.uc.edu]  
**Sent:** Thursday, September 24, 2015 3:53 PM  
**To:** Dexter, Phyllis Adele  
**Cc:** Bakas, Tamilyn (bakastn); Bakas, Tamilyn  
**Subject:** Need written approval for manuscript

Hi Phyllis, I was able to resubmit the TASK II Primary Outcomes paper to the journal *Stroke* today. I am hoping it gets accepted this time. Attached is the cover letter, response to reviewers, and manuscript. I included you in the acknowledgements section in the "merged" file on p. 17 since you provided such wonderful copyediting.

Below is the link... Can you print, sign, date, scan, and email to me? <http://www.ahajournals.org/site/misc/permission.xhtml>

If that's too difficult, can you reply to this email saying that you give your permission to be mentioned by name in the Acknowledgement section of the manuscript entitled, "*Telephone Assessment and Skill-Building Kit for Stroke Caregivers: A Randomized Controlled Clinical Trial*" (MS ID: STROKE/2015/011099 – R1) that was submitted to the journal *Stroke* by first author Tamilyn Bakas.

Thanks!

*Tami*

Tamilyn Bakas, PhD, RN, FAHA, FAAN  
Professor and Jane E. Procter Endowed Chair  
University of Cincinnati College of Nursing  
3110 Vine Street, Procter Hall #231  
PO Box 210038  
Cincinnati, Ohio 45221-0038  
Office: 513-558-2254  
Fax: 513-558-2142  
[tamilyn.bakas@uc.edu](mailto:tamilyn.bakas@uc.edu)  
**UC Nurses. We See Leaders.**  
**Find out more at [www.nursing.uc.edu](http://www.nursing.uc.edu)**
